# Supplementary material for: Sex differences in outcomes of methadone maintenance treatment for opioid addiction: a systematic review protocol
Source: PubMed Central journal article supplement (PMC4031161; doi:10.1186/2046-4053-3-45), 2014-05-16
Supplement: 2046-4053-3-45-S1.pdf [file 2046-4053-3-45-S1.pdf]

**SYSTEMATIC REVIEW FULL-TEXT EXTRACTION FORM**

**STUDY INFORMATION**

Study ID: \_\_\_\_\_ Reviewer Initials: \_\_\_\_\_

Last Name of First Author, Initial: \_\_\_\_\_ Year of Publication: \_\_\_\_\_

Title of Article: \_\_\_\_\_

Journal Name: \_\_\_\_\_ City, Country: \_\_\_\_\_

**METHODS**

Study Setting: \_\_\_\_\_ Study Design: \_\_\_\_\_

Sample Size: Total \_\_\_\_\_, Men \_\_\_\_\_, Women \_\_\_\_\_

Mean Age (SD): Total \_\_\_\_\_, Men \_\_\_\_\_, Women \_\_\_\_\_

Ethnicity: \_\_\_\_\_

**RESULTS**

MMT-related Outcome (See List of Outcomes in Protocol): \_\_\_\_\_

Specific domain of outcome (See List of Domains in Protocol): \_\_\_\_\_

Outcome Definition: \_\_\_\_\_

Outcome Measurement: \_\_\_\_\_

Outcome Values: Men \_\_\_\_\_, Women \_\_\_\_\_

Statistical Testing/Methods: \_\_\_\_\_

Statistical Results: Coefficient \_\_\_\_\_, 95% CI \_\_\_\_\_, p-value \_\_\_\_\_

Study Limitations: \_\_\_\_\_

- Inclusion [must check all to be included]**
- The study is looking at MMT patient populations
  - Study participants on MMT for the treatment of opioid addiction
  - The study participants are human
  - The study has been completed
  - The study is in English

**Exclusion [exclude study if any of the following is checked]:**

- Incomplete studies
- Abstract only
- The primary focus of the study is not MMT-related
- The study focuses on a different Substitute Opioid Therapy (i.e. suboxone)
- The study is on animal populations

**Comments:** \_\_\_\_\_
